# Supplementary material for: Insights From Genetic Studies of Cerebral Palsy
Source: Front Neurol. 2021 Jan 21;11:625428. doi: 10.3389/fneur.2020.625428 (PMC7859255; doi:10.3389/fneur.2020.625428)
Supplement: Supplemental Table 1 — Curated sequence variants from whole exome sequencing studies of cerebral palsy cohorts. [file Table_1.XLSX]

## Sheet: variants
	publication information		variant info					clinical info
Gene	Author, year	PMID	variant	# patients	Pathogeneticty call (source: author and/or Varsome)	variant validation	LoF/GoF evidence	movement disorder,	key comorbidities	developmental defects and imaging findings	Inheritance
ADCY5	Zouvelou, 2019	30799092	p.R418W	1	Likely pathogenic (varsome)	Functional studies of the R418W variant revealed significant increase in intracellular cAMP and adenylyl cyclase activity PMID: 24700542	GoF	Choreic	not reported	normal MRI	not reported
AGAP1	van Eyk, 2019	6828700	c.957+1G>A	1	Uncertain (author); also carries COL4A1 variant		splicing	spastic quad with generalised hypotonia, dystonic posturing and myoclonic jerks,	ID, epilepsy, reduced oral control and tongue movement,	PVL in frontal and parietal lobes (L>R), absent L caudate nucleus, putamen and globus pallidus, short stature at 4 years,	de novo
AGAP1	van Eyk, 2019	6828700	p.P467R	1	Uncertain (author)			spastic diplegia, mild dystonic	DD	. MRI: Posterior periventricular changes consistent with PVL. A hypogenetic corpus callosum with an absent splenium. Linear lipoma over the corpus callosum	de novo
AGAP1	van Eyk, 2019	6828700	p.P411L	1	Uncertain (author)			spastic quadriplegia	DD, epilepsy, squint nystagmus, feeding difficulties	MRI: Bilateral grade III intraventricular haemorrhage with moderate asymmetric ventriculomegaly with mild rightward subfalcine herniation	not maternal (father unavailable)
AKT3	Matthews, 2019	30542205	p.V183D	1	Pathogenic (author)			not reported	ID	major congenital anomaly outside CNS, MRI evidence of stroke/brain iron accumulation/white matter lesion	autosomal dominant
ALK	Jin, 2020	32989326	p.S1081R	1	Likely pathogenic (varsome)	no		Spastic diplegia	mild kinetic tremor, ADHD, anxiety	Atrial septum defect, scattered subcortical hyperintensities	de novo
ALK	Jin, 2020	32989326	p.W1320X	1	Pathogenic (varsome); also carries SPG11 variants	no	early truncation	Spastic-dystonic diplegia	epilepsy	gliosis in thalami+left external capsule; high subcortical white matter of parietal lobes+corticospinal tract	de novo
ALKBH3	van Eyk, 2018	29681622	p.122fs	1	Uncertain (varsome)	decreased expression transcriptomics van Eyk 2018	LoF	spastic diplegia	epilepsy		unknown
AMPD2	Takezawa, 2018	29761117	p.L173X	1	Pathogenic (author)	AMP deminase activity assay with EBV-LCL significant reduction in protein activity but no distinction between two the variants PMID: 29761117	early truncation	Spastic diplegia	ID, Autistic features, Irritability	Basal ganglia hyperintensity, white matter atrophy	AR compound heterozygous
	Takezawa, 2018	29761117	p.P456L	1	Pathogenic (author)
AMPD2	Jin, 2020	32989326	p.R503P	1	Likely Pathogenic (varsome)	no		Spastic-dystonic quadriplegia		dysplastic corpus callosum, delayed myelination, and diminished perisylvian volumes	AR compound heterozygous
	Jin, 2020	32989326	p.559_566del	1	Uncertain (see column G)	Likely SNP nearby (p.Arg556His- Likely pathogenic Varsome ID: 10190011101713620001) and another frameshiftdeletion (p.Asp552ThrfsTer67-pathogenic Varsome ID-chr1-110171347-G-).
AP4M1	Jin, 2020	32989326	p.Q373X	1	Pathogenic (varsome)	no	Early truncation	Spastic-dystonic quadriplegia	dysarthria, epilepsy, strabismus	delayed myelination, ventriculomegaly,	AR compound heterozygous
	Jin, 2020	32989326	p.R441X	1	Pathogenic (varsome)	no	Early truncation
AP5Z1	Jin, 2020	32989326	p.D43N	1	Uncertain (varsome)	no		Spastic quadriplegia	global DD, epilepsy	microcephaly, diminished cerebral volumes with delayed myelination	homozygous
ASXL1	Matthews, 2019	30542205	p.R1068X	1	Pathogenic (author)			not reported	ID	MRI evidence of stroke/brain iron accumulation/white matter lesion, congenital anomaly outside CNS	autosomal dominant
ATL1	Zouvelou, 2019	30799092	p.R239C	1	Pathogenic (varsome)	Variant impairs function and trafficking of ATL1 PMID:16537571	dominant negative LoF	Spastic	not reported	normal MRI	not reported
ATL1	Jin, 2020	32989326	p.A350V	1	Pathogenic (varsome)	no		Spastic diplegia		Subcortical and periventricular T2 hyperintensities	de novo
ATL1	Jin, 2020	32989326	p.K406Q	1	Pathogenic (varsome)	no		Spastic-dystonic quadriplegia	ID	PVL	de novo
ATL1	Zouvelou, 2019	30799092	p.N355K	1	Likely pathogenic (varsome)	reduced GTPase activity and prominently disrupted ER network morphology when expressed in COS7 cells PMID: 21194679	LoF	Spastic	not reported	normal MRI	not reported
ATL1	Zouvelou, 2019	30799092	p.R239C	1	Pathogenic (varsome)	Variant impairs function and traficking of ATL1 PMID:16537571	dominant negative LoF	Spastic	not reported	normal MRI	not reported
ATM	Zouvelou, 2019	30799092	p.N405KfsX15	1	Pathogenic (varsome)	no	Early truncation	Ataxic dyskinetic	not reported	normal MRI	not reported
	Zouvelou, 2019	30799092	p.P552QfsX4	1	Pathogenic (varsome)	no	Early truncation	Ataxic dyskinetic		normal MRI	not reported
BCAP31	Cordeiro, 2018	30283815	c.533_536dup p.Ser180Alafs*6	1	Pathogenic (varsome)	no	Early truncation	Dystonia, choreathetosis	global DD, sensory neural hearing loss, hypotonia		not reported
CACNA1A	Takezawa, 2018	29761117	p.S218L	1	Pathogenic (author)			Ataxic type	ID, Epilepsy	no	de novo
CACNA1A	Zouvelou, 2019	30799092	p.F1509S	1	Likely Pathogenic (varsome)	no		Ataxic	not reported	normal MRI	not reported
CAMTA1	Cordeiro, 2018	30283815	c.882_883insCG p.Gly295ArgfsX96	1	Pathogenic (varsome)	no	Early truncation	Ataxia	global DD, hypotonia, epilepsy		not reported
CHRNA1	Matthews, 2019	30542205	p.P142S	1	Uncertain (author)			not reported	ID	MRI evidence of stroke/brain iron accumulation/white matter lesion, congenital anomaly	autosomal dominant
COL4A1	van Eyk, 2019	6828700	p.G805R	1	Pathogenic (author); also has AGAP1 splicing variant			spastic quad with generalised hypotonia, dystonic posturing and myoclonic jerks,	ID, epilepsy, reduced oral control and tongue movement	PVL in frontal and parietal lobes (L>R), absent left caudate nucleus, putamen and globus pallidus, short stature at 4 years	paternal
COL4A1	van Eyk, 2019	6828700	p.G832R	1	Pathogenic (author)			choreoathetoid quad	Epileptic encephalopathy, no speech or communication, global DD	MRI: haemorrhagic gliosis, cystic porencephaly involving basal ganglia; damage to small blood vessels with increased risk of tracheobronchomalacia	not maternal (father unavailable)
CTNNB1	Takezawa, 2018	29761117	p.E562AfsX11	1	Pathogenic (author)		early truncation	Spastic diplegia	ID, Hyperekplexia	no	de novo
CTNNB1	Jin, 2020	32989326	p.E54X	1	Pathogenic (varsome)	no	Early truncation	Spastic-dystonic diplegia	ID, ADHD, explosive behavior, strabismus, middle ear effusions		de novo
CTNNB1	Jin, 2020	32989326	p.F99fs	1	Pathogenic (varsome)	no	frame shift	Spastic diplegia	ID, behavior outbursts, non-verbal, focal epilepsy	Bilateral frontal pachygyria, mild microcephaly	de novo
CTNNB1	Jin, 2020	32989326	p.R449fs	1	Pathogenic (varsome)	no	frame shift	Spastic-dystonic diplegia	ID, aggressive behavior, limited language, esotropia, dysphagia	dysmorphic features, microcephaly	de novo
CTNNB1	Cordeiro, 2018	30283815	c.1043_1044delCT p.Ser348CysfsX4	1	Pathogenic (varsome)	no	Early truncation	Dystonia	global DD	microcephaly	not reported
CYP2U1	Takezawa, 2018	29761117	p.F218fsX42	1	Pathogenic (author)		frame shift	Spastic diplegia	ID	Deep white matter hyperintensity	AR compound heterozygous
CYP7B1	Zouvelou, 2019	30799092	p.C203Y	1	Uncertain (varsome)	no		Spastic dystonic	not reported	normal MRI	not reported
DDC	Zouvelou, 2019	30799092	p.W267R	1	Uncertain (varsome)	no		Dystonic	not reported	normal MRI	not reported
DGKZ	Matthews, 2019	30542205	p.A39RfsX52	1	Pathogenic (author)	yes	frame shift and early termination	not reported	ID	microcephaly, nystagmus, atrophy of cerebellum/vermis	AR compound heterozygous
			p.T1076R		Uncertain (author)
DHX32	Jin, 2020	32989326	p.I266M	1	Likely Pathogenic (varsome)	no		Generalized hypotonic-dystonia	ID, dysphagia, poor weight gain, myclonus	mildly diminished cerebral volume	de novo
DHX32	Jin, 2020	32989326	p.Y228C	1	Likely pathogenic (varsome)	no		Spastic diplegia	ID, ASD, esotropia, anxiety, behavioral issues	PVL	de novo
EHMT1	Matthews, 2019	30542205	p.Y479HfsX70	1	Pathogenic (author)			not reported	ID	abnormal biochemical or neurotransmitter profile, congenital anomaly	autosomal dominant
EPHA4	Matthews, 2019	30542205	p.A748T	1	likely pathogenic (author)			not reported	ID	Atypical neurologic pattern (hypertonia, ataxia or transient episodic exacerbations of neurologic symptoms)	autosomal dominant
ERLIN1	van Eyk, 2019	6828700	p.R90Q	1	Uncertain (author)			not reported	not reported	not reported	Unknown
FARS2	Jin, 2020	32989326	p.P361L	1	Likely Pathogenic (varsome)	no		Hypotonic	ID	dysgenesis of the corpus callosum, colpocephaly, diminished periventricular white matter volume, PVL	homozygous
FBXO31	Jin, 2020	32989326	p.D334N	1	Likely pathogenic (varsome)	Functional assays showed GoF cyclin D degradation PMID: 32989326	GoF	Spastic diplegia	esotropia, ID, dysarthria, mixed receptive/expressive language disorder, ADHD	cleft palate, intestinal malrotation and midgut volvulus	de novo
FBXO31	Jin, 2020	32989326	p.D334N	1	Likely Pathogenic (varsome)	Functional assays showed GoF cyclin D degradation PMID: 32989326	GoF	Spastic paraplegia	ID, attention deficit, anxiety, language impairments, strabismus, severe constipation	Ventricular dilation and thin corpus callosum,	de novo
GAD1	van Eyk, 2019	6828700	p.Y258C	1	Uncertain (author)			spastic hemiplegia	epilepsy, global DD, mild ASD, limited speech	porencephalic cyst; MRI: IVH grade IV	not maternal (father unavailable)
GAD1	van Eyk, 2019	6828700	p.P403L	1	Uncertain (author)			not reported	epilepsy, severe ID	soft palate, congenital bilateral cateracts	not maternal (father unavailable)
GNAO1	Takezawa, 2018	29761117	p.E246K	1	Pathogenic (author)	Expression in HEK-293T cells change in levels of cAMP inhibition PMID: 28747448	GoF	Dyskinetic type	ID	Deep White matter hyperintensity	de novo
GNAO1	Matthews, 2019	30542205	p.R209L	1	likely pathogenic (author)			not reported	ID	MRI evidence of stroke/brain iron accumulation/white matter lesion, abnormal biochemical or neurotransmitter profile	de novo
GRSF1	van Eyk, 2018	29681622	p.340fs	1	Uncertain (varsome)	decreased expression transcriptomics van Eyk 2018	LoF	spastic diplegia			unknown
HPRT1	Zouvelou, 2019	30799092	exon 5 deletion	1	Likely pathogenic (see column G and H)	Exon 5 has many pathogenic variants associated with it, mostly missense substitutions. (Varsome ID- chrX:133624218..133624235)	Exon deletion - probable LoF	Dystonic	not reported	normal MRI	not reported
ITPA	Matthews, 2019	30542205	p.G123SfsX104	1	Pathogenic (author); also has NBAS variant		frame shift and early termination	not reported	ID	MRI evidence of stroke/brain iron accumulation/white matter lesion, abnormal biochemical or neurotransmitter profile	AR compound heterozygous
			p.T163M		Uncertain (author)
ITPR1	Parolin Schnekenberg et al., 2015	25981959	p.N602D	1	Likely pathogenic (author)	variant reported in autosomal dominant non-progressive cerebellar ataxia PMID: 22986007		ataxic	Moderate ID	normal MRI	de novo
ITPR1	Parolin Schnekenberg et al., 2015	25981959	4459_4460delinsGA/p.S1487D	1	Likely pathogenic (author)	no		ataxic	Moderate ID	normal MRI	de novo
KCNC3	Parolin Schnekenberg et al., 2015	25981959	p.T428I	1	Pathogenic (author)	electrophysiology shows channel mutation non functional (PMID: 25981959)	dominant LoF	ataxic	mild ID	normal MRI	de novo
KDM5C	van Eyk, 2019	6828700	p.P413L	1	Pathogenic (author)			spastic quad with greater involvement of lower limbs	severe behaviour problems, speech dyspraxia, photophobia	5th percentile IUGR, small stature, convergent strabismus, ridging metopic suture, mild trigonocephaly	de novo
KDM7A	van Eyk, 2019	6828700	p.S727W	1	Uncertain (author)			spastic/dystonic quadriplegia, more signs on right than left, more dystonia than spasticity,	ID, epilepsy with focal epileptiform abnormality, focal seizures starting at day 7, febrile clonic tonic seizure at 2 years.	IUGR, neonatal hypoglycaemia MRI: extensive PVL	de novo
KDM7A	van Eyk, 2019	6828700	p.V162F	1	Uncertain (author)			not reported	DD, epilepsy, optic nerve loss		Unknown
KIDINS220	Matthews, 2019	30542205	p.Q1380X	2	likely pathogenic (author)			not reported	ID	MRI evidence of stroke/brain iron accumulation/white matter lesion, abnormal biochemical or neurotransmitter profile, congenital abnormality	paternal (mosaic)
KIF1A	van Eyk, 2019	6828700	p.R316W	1	Pathogenic (author)			spastic/dystonic diplegia	microcephaly, developmental disorders and cortical visual impairment	MRI: non-specific white matter hyperintensity	de novo
KMT2C	Matthews, 2019	30542205	p.E2834D	1	Uncertain (author)			not reported	ID	MRI evidence of stroke/brain iron accumulation/white matter lesion, abnormal biochemical or neurotransmitter profile	AR homozygous
L1CAM	van Eyk, 2019	6828700	p.P713S	1	Likely pathogenic (author)			spastic diplegia		2nd percentile IUGR, macrocephaly, hydrocephalus, MRI and CT: Absent corpus callosum with associated colpocephaly, hypoplasia of the cortical mantle and gross ventriculomegaly.	X-linked
LYST	Zouvelou, 2019	30799092	p.Q562H	1	Uncertain (varsome)	no		Spastic dystonic	not reported	normal MRI	not reported
MAOB	van Eyk, 2019	6828700	c.1138-1G>A	1	Uncertain (author)			spastic hemiplegia	severe sleep disturbance, anxiety issues, behaviour problems	Irregularity and dilation of the left lateral ventricle associated with periventricular white matter volume loss and thinning of the corpus callosum	X-linked
MAOB	van Eyk, 2019	6828700	p.T327M	1	Uncertain (author)			spastic quadriplegia	epilepsy as child, DD, visual problems, seizures as neonate	BW: 9th percentile IUGR, kyphoscoliosis	X-linked
MAOB	van Eyk, 2019	6828700	p.T327M	1	Uncertain (author)			spastic hemiplegia	epilepsy, visual problems	BW: 7th percentile IUGR, MRI: decreased volume of the right cerebral hemisphere and dilation of the posterior bodies of both lateral ventricles.	not maternal, also in unaffected twin
MAST1	van Eyk, 2019	6828700	p.P500L	1	Likely pathogenic (author)			spastic diplegia,	mild learning problem, behavioural problems	resolved atrial septal defect, MRI: mild generalised volume loss, PVL, cystic encephalomalacia.	de novo
MMADHC	van Eyk, 2018	29681622	p.R158X	1	Pathogenic (varsome)	decreased expression transcriptomics van Eyk 2018	LoF	spastic quadriplegia	ID, epilepsy, DD	polymicrogyria	maternal
MTPAP	Zouvelou, 2019	30799092	c.1313-3C>T	1	Uncertain (varsome)	no	non-coding	Spastic dystonic	not reported	normal MRI	not reported
NAA10	Matthews, 2019	30542205	p.L121V	1	Likely pathogenic (author)			not reported	ID	normal brain MRI w neurologic impairment, abnormal biochemical and neurotransmitter profile	autosomal dominant
NBAS	Matthews, 2019	30542205	p.L1955S	1	Uncertain (author); also has ITPA variant			not reported	ID	MRI evidence of stroke/brain iron accumulation/white matter lesion, abnormal biochemical or neurotransmitter profile	AR compound heterozygous
			p.T1710M		Uncertain (author)
NKX2-1	Zouvelou, 2019	30799092	c.254_255insG, p.Y86L	1	Uncertain (varsome)	no		Choreic	Benign hereditary chorea, neonatal respiratory distress and pneumothorax, 10 years old she was diagnosed with hypothyroidism	normal MRI	not reported
NKX2-1	Zouvelou, 2019	30799092	c.254_255insG, p.Y86L	1	Uncertain (varsome)			Ataxic dyskinetic	not reported	normal MRI	not reported
NT5C2	van Eyk, 2019	6828700	p.R39*	1	Pathogenic (author)		stop gain	spastic diplegia	DD, ASD, moderate ID, ADHD, OCD, severe behavioural problems	MRI: PVL	homozygous
NT5C2	Jin, 2020	32989326	p.R10X	1	Pathogenic (varsome)	no	Early truncation	Spastic diplegia	ASD, ADHD, anxiety, OCD, glaucoma, oppositional behavior	equivocally thickened corpus callosum	homozygous
PAK3	van Eyk, 2019	6828700	p.R493C	1	Uncertain (author)			dystonic spastic hemiplegia,	epilepsy, low - average cognitive ability	BW: <1 percentile IUGR MRI: grade 4 IVH, right sided and grade 2 IVH left sided, hydrocephalus,	X-linked
PALM	Matthews, 2019	30542205	p.R24Q	1	Uncertain (author)			not reported	ID	MRI evidence of stroke/brain iron accumulation/white matter lesion, abnormal biochemical or neurotransmitter profile	AR compound heterozygous
			p.T154M		Uncertain (author)
PDHA1	Zouvelou, 2019	30799092	p.G268R	1	Uncertain	no		Ataxic dyskinetic	not reported	normal MRI	not reported
PLP1	Matthews, 2019	30542205	p.R127SfsX17	1	Pathogenic (author)			not reported	ID	MRI evidence of stroke/brain iron accumulation/white matter lesion	X-linked
PLXNA2	Matthews, 2019	30542205	p.G736S	1	Likely pathogenic (author)			not reported	ID	MRI evidence of stroke/brain iron accumulation/white matter lesion, abnormal biochemical or neurotransmitter profile, congenital anomaly	autosomal dominant
QDPR	Zouvelou, 2019	30799092	p.A156T	1	Uncertain (varsome)	no		Dystonic	not reported	normal MRI	not reported
RHOB	Jin, 2020	32989326	p.S73F	1	Likely Pathogenic (varsome)	Functional protein assays showed enhanced GTP binding and hydrolysis PMID: 32989326	GoF	Spastic-dystonic diplegic	ID, Expressive language disorder	coarctation of the aorta, bowel malrotation with volvus	de novo
RHOB	Jin, 2020	32989326	p.S73F	1	Likely pathogenic (varsome)	Functional protein assays showed enhanced GTP binding and hydrolysis PMID: 32989326	GoF	Spastic-dystonic diplegic	ID, Expressive language disorder	coarctation of the aorta	de novo
SCN2A	Takezawa, 2018	29761117	p.L1765P	1	Likely pathogenic (author)	no		Spastic diplegia	ID, epilepsy, autistic features, hemolysis	no	de novo
SCN2A	Cordeiro, 2018	30283815	p.Arg220Gly	1	Likely pathogenic (varsome)	no		Ataxia, hyperkinesia	global DD, ASD, epilepsy		not reported
SCN3A	Matthews, 2019	30542205	p.L209P	1	Likely pathogenic (author)			not reported	ID	MRI evidence of stroke/brain iron accumulation/white matter lesion, abnormal biochemical or neurotransmitter profile, congenital anomaly	autosomal dominant
SLC13A5	Cordeiro, 2018	30283815	c.716+5G>A	1	Uncertain (varsome)	no	noncoding/abnormal splicing	Hyperkinesia	global DD, epilepsy	microcephaly	not reported
SLC2A1	Zouvelou, 2019	30799092	c.1216_1217ins82	1	Uncertain (see column G)	Likely pathogenic variant at 1214C>A (Varsome ID-chr1-43393340-G-T) and VUS at c.1216G>A (Varsome ID chr1-43393338-C-T).		Ataxic spastic	not reported	normal MRI	not reported
SLC2A1	Zouvelou, 2019	30799092	p.Y292H	1	Likely Pathogenic (varsome)	no		Ataxic spastic dyskinetic	not reported	normal MRI	not reported
SLC6A3	van Eyk, 2019	6828700	p.T400M	1	Uncertain (author)			spastic hemiplegia	DD, mild ID, epilepsy (focal seizures), behaviour problems	respiratory distress syndrome, <1 percentile IUGR	not maternal
SLC6A3	van Eyk, 2019	6828700	p.R85W	1	Uncertain (author)			spastic quadriplegia	hearing & vision loss	2nd percentile IUGR, microcephaly	paternal
SPAST	Takezawa, 2018	29761117	p.L426F	1	Pathogenic (author)	Diff variant at same position is deleterious and pathogenic (Clinvar)		Spastic diplegia	ID	no	de novo
SPAST	Takezawa, 2018	29761117	p.R499H	1	Pathogenic (author)	Documented in more than one patient		Spastic diplegia	ID	no	de novo
SPAST	Jin, 2020	32989326	p.D441G	1	Pathogenic (varsome)	no		Spastic diplegia	anxiety	scattered subcortical T2 hyperintensities	de novo
SPAST	Jin, 2020	32989326	p.A495P	1	Pathogenic (varsome)	no		Spastic-dystonic diplegia		Anemia	de novo
SPAST	Zouvelou, 2019	30799092	p.G546R	1	Likely pathogenic (varsome)	no		Spastic	not reported	normal MRI	not reported
SPAST	Zouvelou, 2019	30799092	c.1245+5G > A	2	Uncertain (varsome)	No	Non coding	Spastic	not reported	normal MRI	not reported
SPAST	Zouvelou, 2019	30799092	p.R499H	1	Pathogenic (varsome)	no		Spastic dystonic	not reported	normal MRI	not reported
SPG11	Jin, 2020	32989326	p.N2397T	1	Uncertain (varsome); also carries ALK variants	no		Spastic-dystonic diplegia	epilepsy	gliosis in thalami, left external capsule, and high subcortical white matter of parietal lobes and corticospinal tract	AR compound heterozygous
	Jin, 2020	32989326	p.L1170I	1	Uncertain (varsome)	no
SPR	Zouvelou, 2019	30799092	p.R150G	1	Likely pathogenic (varsome)	Functional studies demonstrate that the R150G variant reduces sepiapterin reductase enzyme activity in vitro PMID: 11443547	LoF	Ataxic dyskinetic	not reported	normal MRI	not reported
SPTBN2	Zouvelou, 2019	30799092	p.R432H	1	Uncertain (varsome)	no		Ataxic dyskinetic	not reported	normal MRI	maternal (unaffected)
SPTBN2	Parolin Schnekenberg et al., 2015	25981959	p.R480W	1	Likely pathogenic (author)	variant reported for early onset cerebellar ataxia with developmental delay, but without segregation analysis PMID: 22914369 Functional assay shows reduced sodium currents with expression of this variant (PMID: 25981959)	LoF	ataxic	Moderate ID	mild cerebellar hypoplasia/'atrophy'	de novo
SREK1	van Eyk, 2019	6828700	p.P57S	1	Uncertain (author)			spastic diplegia		BW: 4th percentile IUGR	de novo
SREK1	van Eyk, 2019	6828700	p.R313C	1	Uncertain (author)				DD, ID	IUGR, microcephaly	not maternal
STK16	van Eyk, 2018	29681622	p.A145fs	1	Uncertain (varsome)	decreased expression transcriptomics van Eyk 2018	LoF	hemiplegia			unknown
STK16	van Eyk, 2018	29681622	p.R50X	1	Uncertain (varsome)	decreased expression transcriptomics van Eyk 2018	LoF	hemiplegia	epilepsy		maternal (maternal uncle also affected)
STXBP1	Takezawa, 2018	29761117	p.R235G	1	Likely pathogenic (author)	no		Ataxic type	ID, Intention tremor	no	de novo
STXBP1	Cordeiro, 2018	30283815	partial deletion of exon 3-4	1	Uncertain (N/A)			Ataxia	global DD, epilepsy		not reported
STXBP1	Cordeiro, 2018	30283815	p.Arg122X	1	Pathogenic (varsome)	no	Early truncation	Ataxia	global DD, hypotonia		not reported
TBCK	Matthews, 2019	30542205	p.R261S	1	Uncertain (author)			not reported	ID, multiorgan disease	abnormal biochemical or neurotranmitter profile, congenital anomaly	AR compound heterozygous
			c.2060-2A>G		Uncertain
TCF4	Matthews, 2019	30542205	p.T606_L609del	1	Likely pathogenic (author)			not reported	ID	MRI evidence of stroke/brain iron accumulation/white matter lesion, congenital anomaly	autosomal dominant
TENM1	van Eyk, 2019	6828700	p.R2195Q	1	Uncertain (author)				DD, epilepsy, vision impairment	hydrocephalus	not maternal
TH	Zouvelou, 2019	30799092	p.L236P	10	Likely pathogenic (varsome)	Functional assays show reduced enzymatic activity and this variant has been reported multiple times with same phenotype - trosine hydroxylase deficiency.		Dystonic	not reported	normal MRI	not reported
TUBA1A	Jin, 2020	32989326	p.R123C	1	Pathogenic (varsome)	no		Spastic quadriplegia	ID, ASD	Hydrocephalus, cerebellum and corpus callosum abnormalities, optic nerve hypoplasia	de novo
TUBA1A	Jin, 2020	32989326	p.L152Q	1	Pathogenic (varsome)	no		Spastic diplegia	ID	cerebellar and corpus callosum anomalies	de novo
TUBA1A	Jin, 2020	32989326	p.Y408D	1	Pathogenic (varsome)	no		Spastic diplegia	ADHD	Right hemisphere polymicrogyria, mild ventricle asymmetry	de novo
TUBB4A	Matthews, 2019	30542205	p.V255I	1	Pathogenic (author)			not reported	ID	MRI evidence of stroke/brain iron accumulation/white matter lesion, abnormal biochemical or neurotransmitter profile, congenital anomaly	autosomal dominant
TXN2	van Eyk, 2018	29681622	c.263_5G>T	1	Uncertain (varsome)	decreased expression transcriptomics van Eyk 2018	LoF	dyskinetic/spastic CP, dystonia and athetosis			maternal
WDR74	van Eyk, 2018	29681622	p.Q258X	1	Uncertain (varsome)	decreased expression transcriptomics van Eyk 2018	LoF	hemiplegia	ASD, ADHD		unknown
			unique patients	130

## Sheet: CNVs by publication
		publication information		variant info			clinical info
chromosomal location	Genes	Author, year	PMID	# patients (w/ variant)	pathogenecity call (author)	variant identification and validation	movement disorder,	key comorbidities,	developmental defects (imaging/facial).	Inheritance
del Xp11.23p11.22	WDR45	Segel et al., 2015	25817843	1	Pathogenic	Affymetrix Cytoscan HD arrays	spastic quadriplegia		dysmorphic, white matter changes	de novo
dup Xp22.33-Xq28		Zarrei et al., 2018	28771244	1	Pathogenic	Affymetrix CytoScan HD array, qPCR validation	hemiplegic			de novo
dup Xp22.33-Xq13.1		Zarrei et al., 2018	28771244	1	Pathogenic also has del Xq13.1-Xq28	Affymetrix CytoScan HD array, qPCR validation	hemiplegic			de novo
del Xp22.33-p11.22		Corbett et al., 2018	30564460	1	Pathogenic also has dup 1q43-44	CONIFER (WES), RNA-seq expression	quadriplegic		IUGR	de novo
del Xp22.33-p21.2		Oskoui et al., 2015	26236009	1	Pathogenic also has del Xp22.33.p21.2	Illumina HumanOmni array, qPCR	dyskinetic (predominantely choreoathetotic)	communication difficulties	white matter defects	de novo
del Xq13.1-Xq28		Zarrei et al., 2018	28771244	1	Pathogenic also has dup Xp22.33-Xq13.1	Affymetrix CytoScan HD array, qPCR validation	hemiplegic			de novo
trip Xq28	FLNA	Segel et al., 2015	25817843	1	Pathogenic	Affymetrix Cytoscan HD arrays	spastic diplegia, hypotonia	ID	imaging abnormalities	maternal
del 1p22.3	PDCD6IP	Corbett et al., 2018	30564460	2	Likely pathogenic	CONIFER (WES), RNA-seq expression, zebrafish and mouse knockout models	diplegic	Ep, DD, ASD	cleft lip/palate, IUG	de novo
dup 1q21.1		Corbett et al., 2018	30564460	1	Pathogenic	CONIFER (WES), RNA-seq expression	diplegic		PVL	de novo
del 1q21.1-q21.2		Oskoui et al., 2015	26236009	1	Pathogenic	Illumina HumanOmni array, qPCR	spastic diplegia	congenital esotropia	white matter defects, PVL, corpus collusum thinning	maternal
dup 1q43-q44		Corbett et al., 2018	30564460	1	Pathogenic also has del Xp22.33-p11.22	CONIFER (WES), RNA-seq expression	quadriplegic		IUGR	de novo
del 2p23.1p22.2	SPAST	Segel et al., 2015	25817843	1	Pathogenic	Affymetrix Cytoscan HD arrays	spastic diplegia		borderline dysmorphic	de novo
dup 2p25.3-p13.1		Oskoui et al., 2015	26236009	1	Pathogenic also has del Xp22.33-p21.2	Illumina HumanOmni array, qPCR	dyskinetic (predominantely choreoathetotic)	communication difficulties	white matter defects	de novo
dup 2p25.3-p24.3		Oskoui et al., 2015	26236009	1	Likely pathogenic	Illumina HumanOmni array, qPCR	spastic quadriplegia	myopia, strabismus, non-verbal	hydrocephalus, cortical/subcortical atrophy	de novo
del 2p25.3		Corbett et al., 2018	30564460	1	Pathogenic also has dup20q13.2-q13.33	CONIFER (WES), RNA-seq expression	diplegic	ASD, DD		de novo
del 4p16.3-p15.2		Oskoui et al., 2015	26236009	1	Pathogenic also has del 9p24.3-p24.1	Illumina HumanOmni array, qPCR	spastic quadriplegia	ID, no communication, cortical visual impairment, sensorineuroal auditory impairment	hypoplasia, malformed subarachnoid space	de novo
del 5q14.3	MEF2C	Segel et al., 2015	25817843	1	Pathogenic	Affymetrix Cytoscan HD arrays	dystonia quadriplegia	ID, ASD, Ep	dysmorphic	de novo
del 9p24.3 KANK1	KANK1	Segel et al., 2015	25817843	1	Pathogenic	Affymetrix Cytoscan HD arrays	spastic quadriplegia	ID	borderline dysmoprhic, imaging abnormalities	paternal
del 9p24.3-p24.1	KANK1	Oskoui et al., 2015	26236009	1	Pathogenic als has del 4p16.3-p15.2	Illumina HumanOmni array, qPCR	spastic quadriplegia	ID, no communication, cortical visual impairment, sensorineuroal auditory impairment	hypoplasia, malformed subarachnoid space	de novo
del 9q34.13q34.2	TSC1	Segel et al., 2015	25817843	1	Pathogenic	Affymetrix Cytoscan HD arrays	spastic hemiplegia		borderline dysmorphic, abnormal imaging	maternal
del 14q12q21.2	NKX2-1	Segel et al., 2015	25817843	1	Pathogenic	Affymetrix Cytoscan HD arrays	chorea quadriplegia		borderline dysmorphic, mild imaging abnormalities	de novo
del 14q32.31q32.33	DYNC1H1	Segel et al., 2015	25817843	1	Pathogenic	Affymetrix Cytoscan HD arrays	chorea quadriplegia		dysmorphic, mild imaging abnormalities	de novo
del 15q11.2-q13.1		Oskoui et al., 2015	26236009	1	Pathogenic	Illumina HumanOmni array, qPCR	dyskinetic (predominantely choreoathetotic)	ID, non verbal	cortical/subcortical atrophy	de novo
del 16p11.2-p12.2		Corbett et al., 2018	30564460	1	Pathogenic	CONIFER (WES), RNA-seq expression	hemiplegic	Ep		de novo
del 17p12	PMP22	Zarrei et al., 2018	28771244	1	Pathogenic	Affymetrix CytoScan HD array, qPCR validation	hemiplegic			paternal
del 19q13.12		Segel et al., 2015	25817843	1	Pathogenic	Affymetrix Cytoscan HD arrays	dystonia diplegia		dysmorphic	de novo
dup 20q13.2-q13.33		Corbett et al., 2018	30564460	1	Pathogenic also has del 2p25.3	CONIFER (WES), RNA-seq expression	diplegic	ASD, DD		de novo
dup 22q11		Corbett et al., 2018	30564460	1	Pathogenic	CONIFER (WES), RNA-seq expression	diplegic			de novo
dup 22q11.21		Zarrei et al., 2018	28771244	1	Likely pathogenic	Affymetrix CytoScan HD array, qPCR validation	hemiplegic			paternal
del 22q11.21		Corbett et al., 2018	30564460	1	Pathogenic	CONIFER (WES), RNA-seq expression	hemiplegic	DD	abnormal arch and branching of heart, polymicrogyria	inferred de novo (1 parent unavailable)
del 22q11.21		Segel et al., 2015	25817843	1	Pathogenic	Affymetrix Cytoscan HD arrays	dystonic quadriplegia		dysmorphic	de novo
dup 22q13.31		Oskoui et al., 2015	26236009	1	Likely pathogenic	Illumina HumanOmni array, qPCR	spastic hemiplegia			de novo
			unique patients	28
